# Supplementary material for: The last mile of molecular reaction dynamics virtual experiments: the case of the OH(N = 1–10) + CO(j = 0–3) reaction
Source: Royal Society of Chemistry journal article supplement (doi:10.1039/c2fd20046e), 2012-01-01
Supplement: c2fd20046e.pdf [file c2fd20046e.pdf]

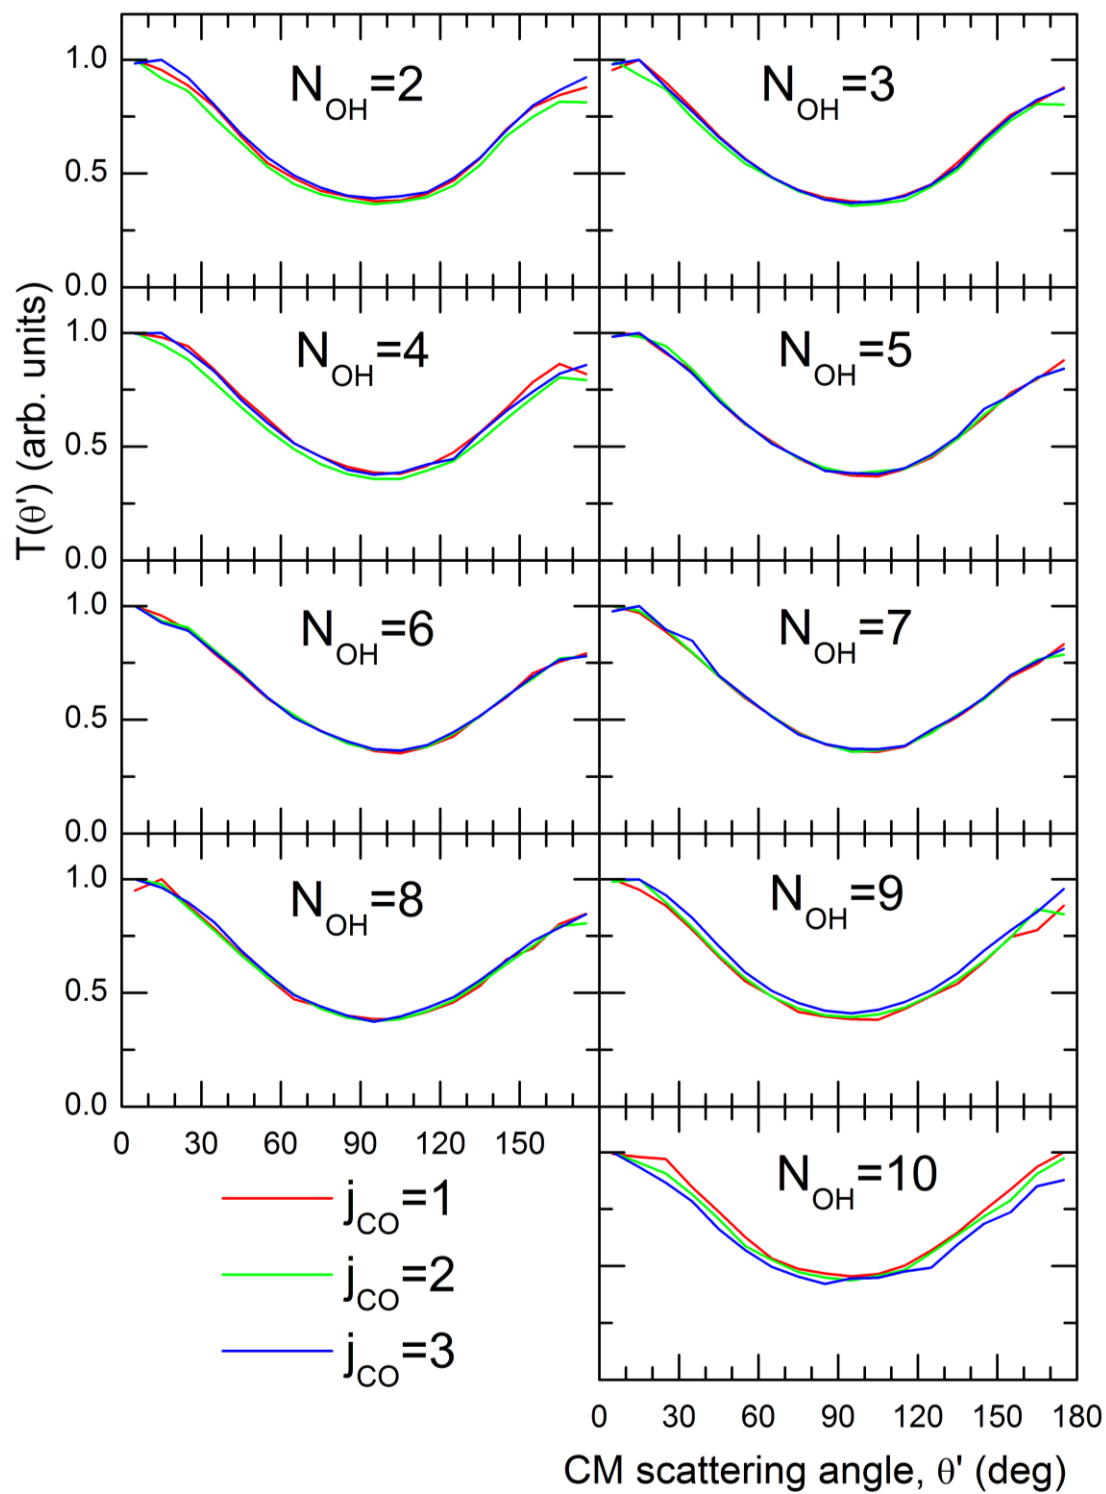

**Fig. S1** PADs for different OH rotational levels for the reactions  $\text{OH}(N) + \text{CO}(j=1,2,3) \rightarrow \text{CO}_2 + \text{H}$  at  $E_c$  of  $8.6 \text{ kcal mol}^{-1}$  from QCT calculations on the YMS PES.

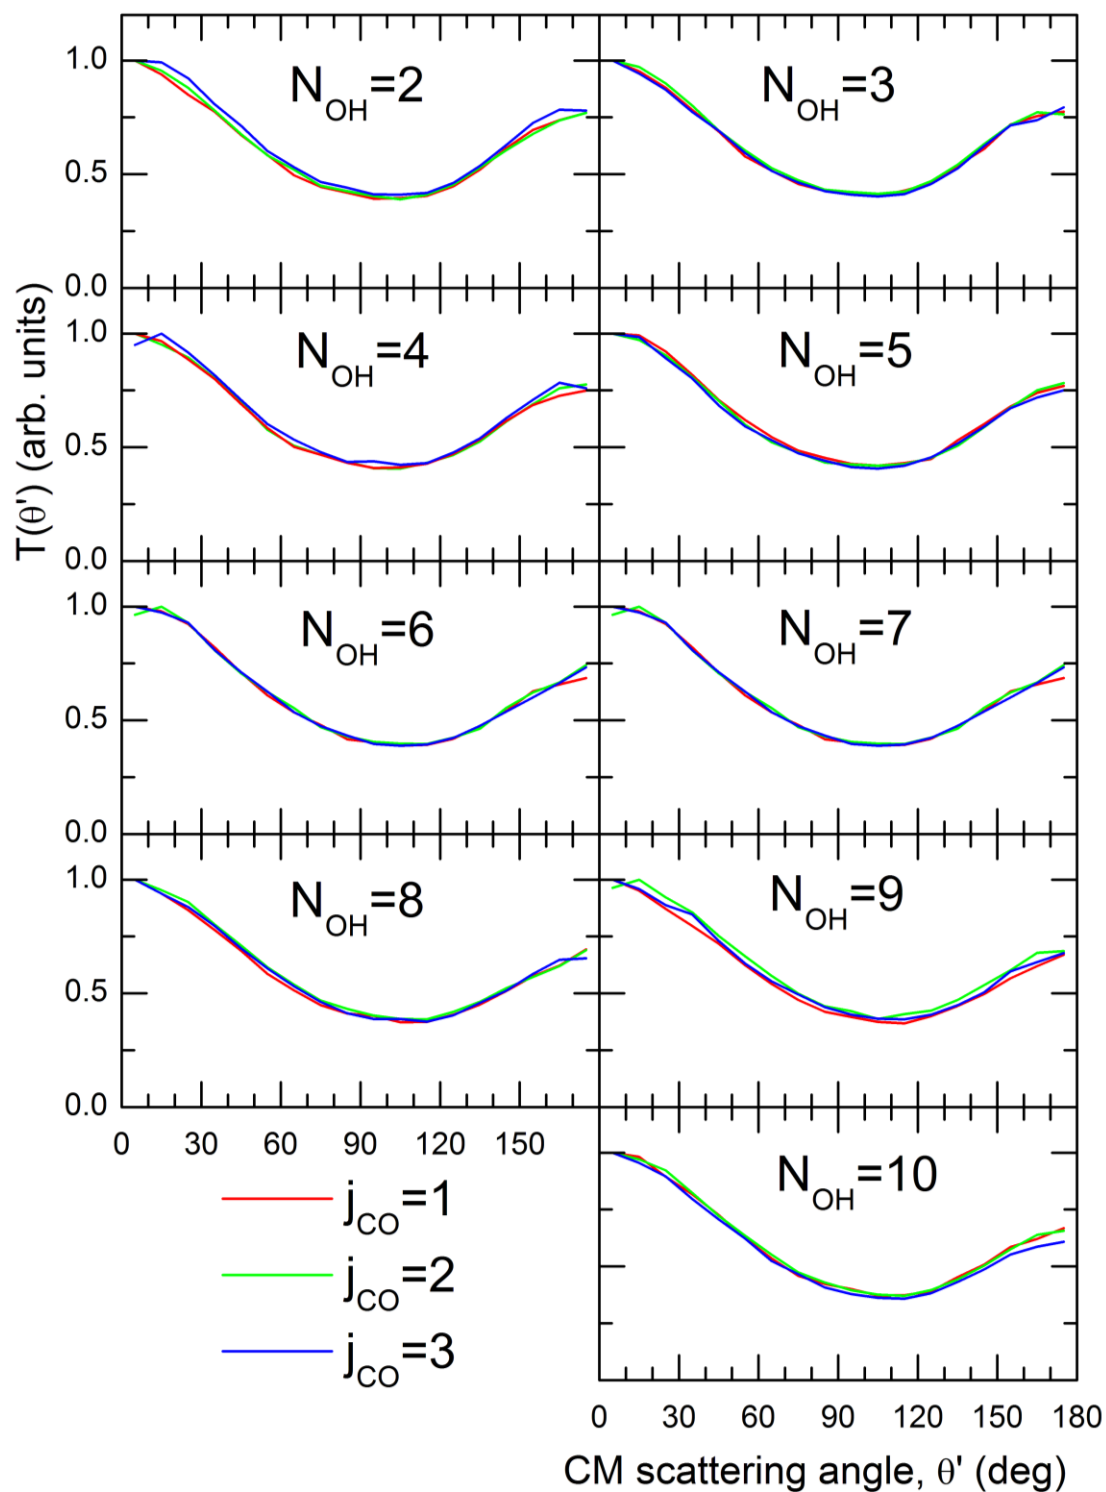

**Fig. S2** PADs for different OH rotational levels for the reactions  $\text{OH}(N) + \text{CO}(j=1,2,3) \rightarrow \text{CO}_2 + \text{H}$  at  $E_c$  of  $14.1 \text{ kcal mol}^{-1}$  from QCT calculations on the YMS PES.

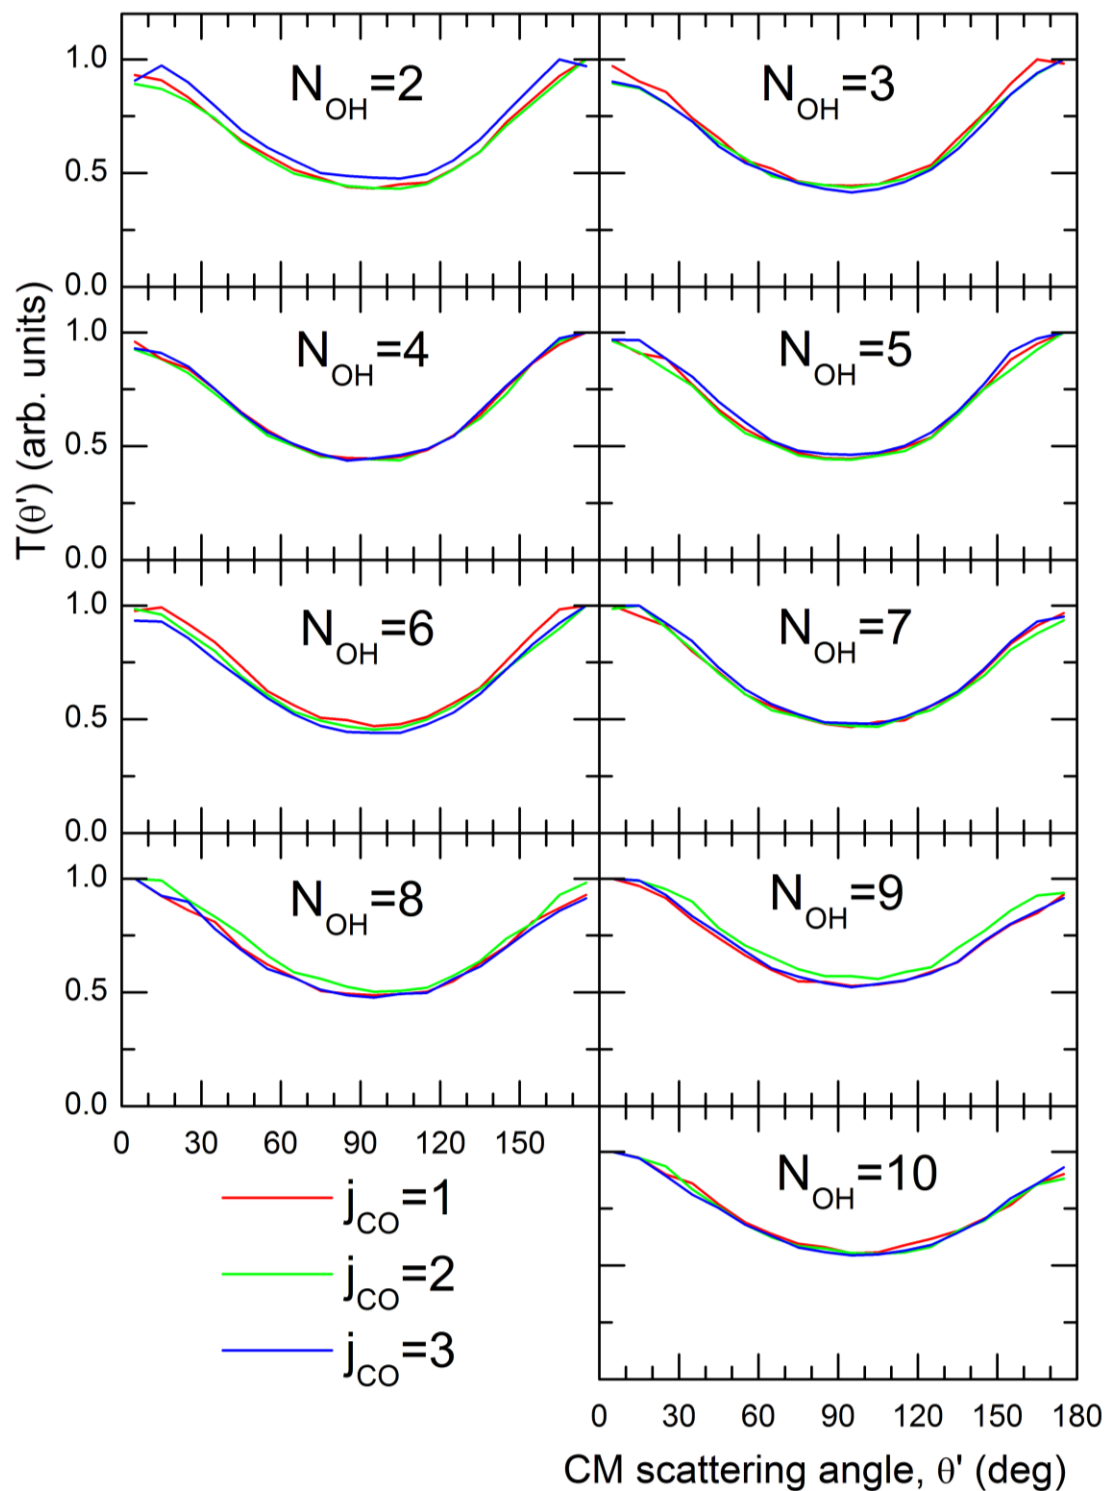

**Fig. S3** PADs for different OH rotational levels for the reactions  $\text{OH}(N) + \text{CO}(j=1,2,3) \rightarrow \text{CO}_2 + \text{H}$  at  $E_c$  of  $8.6 \text{ kcal mol}^{-1}$  from QCT calculations on the LTSH PES.

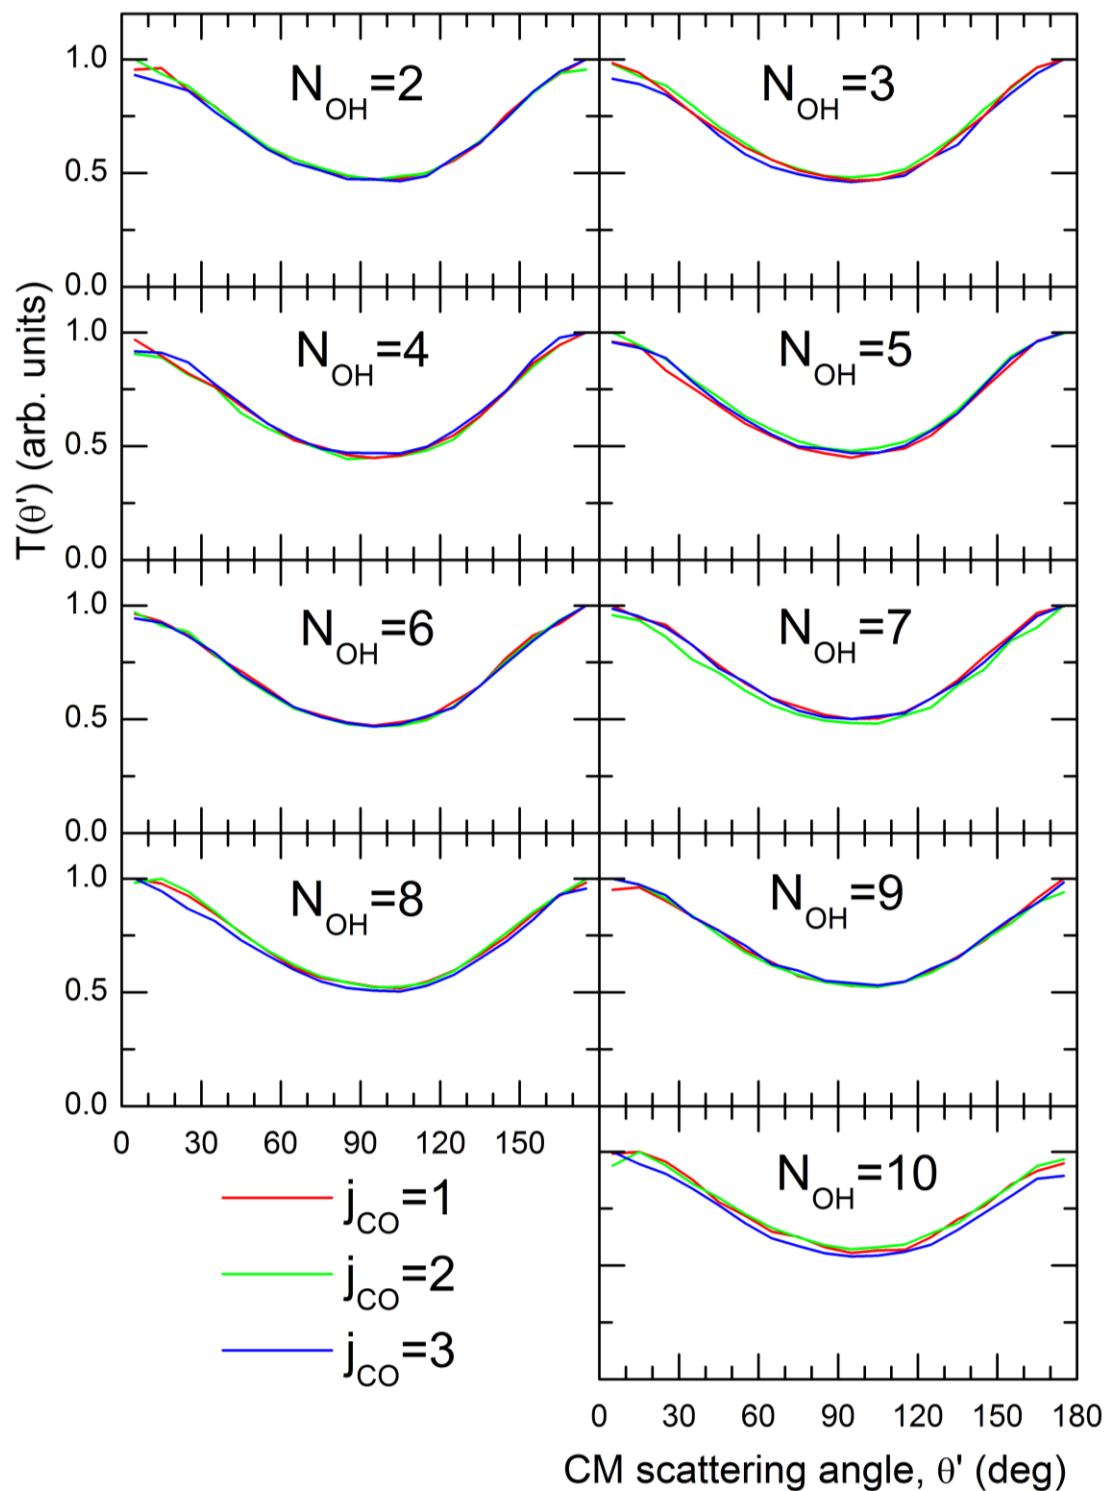

**Fig. S4** PADs for different OH rotational levels for the reactions  $\text{OH}(N) + \text{CO}(j=1,2,3) \rightarrow \text{CO}_2 + \text{H}$  at  $E_c$  of  $14.1 \text{ kcal mol}^{-1}$  from QCT calculations on the LTSH PES.

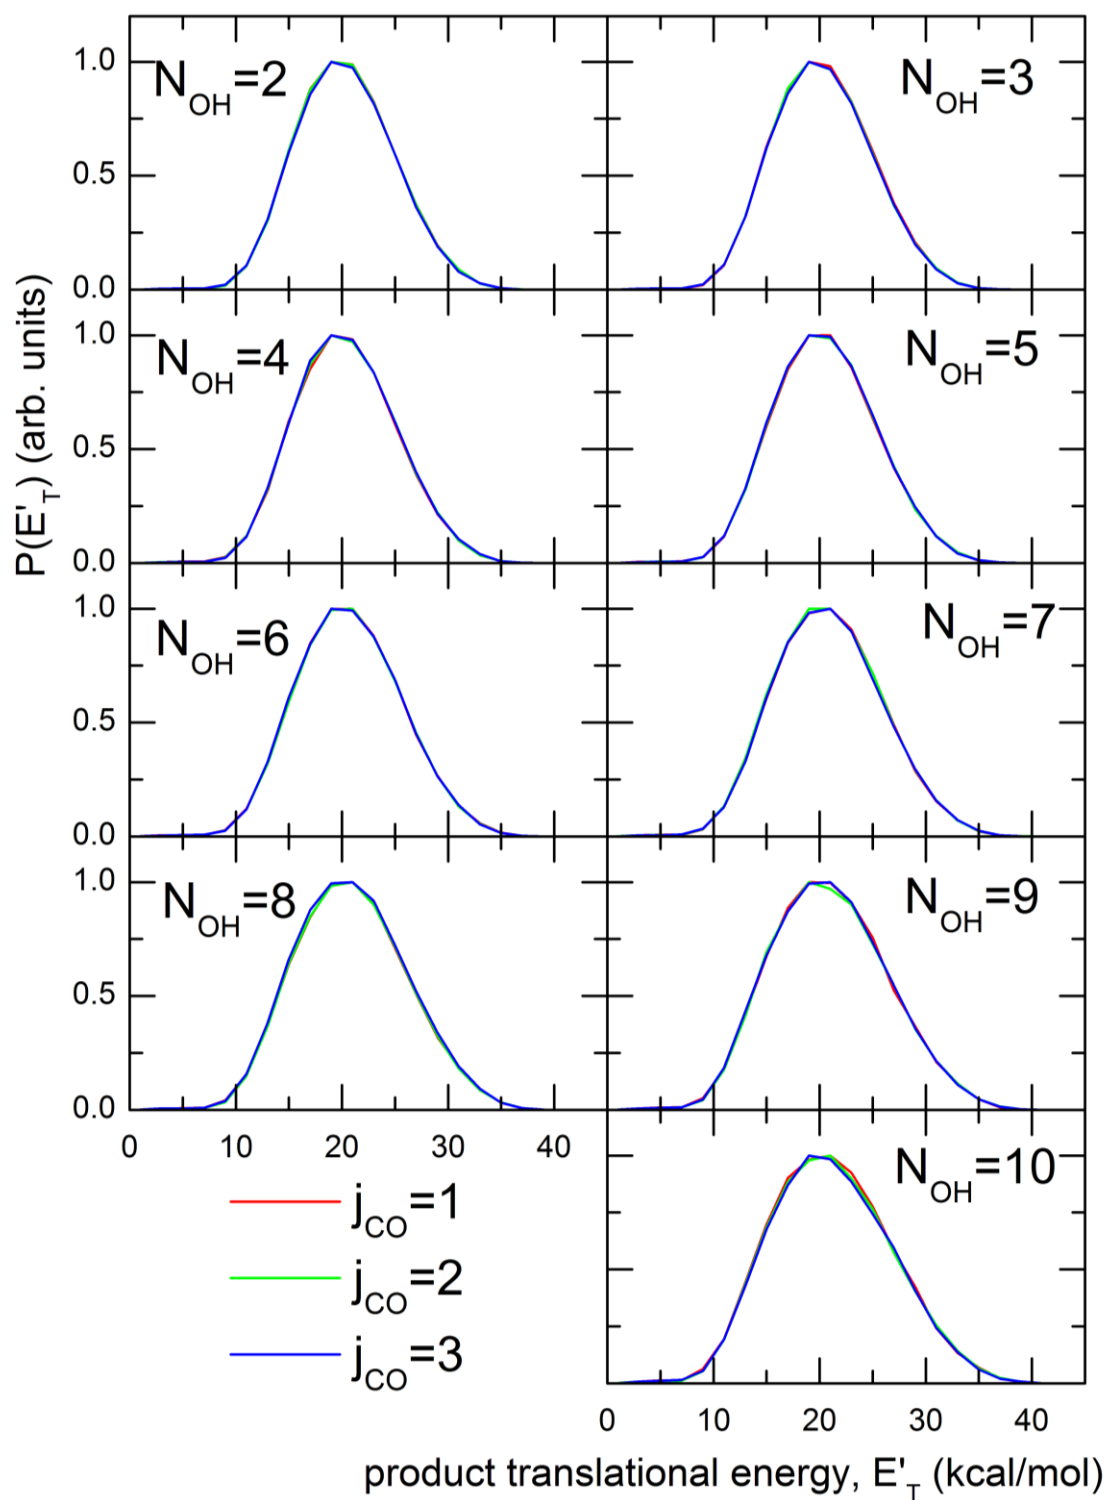

**Fig. S5** PTDs for different OH rotational levels for the reactions  $OH(N) + CO(j=1,2,3) \rightarrow CO_2 + H$  at  $E_c$  of  $8.6 \text{ kcal mol}^{-1}$  from QCT calculations on the YMS PES.

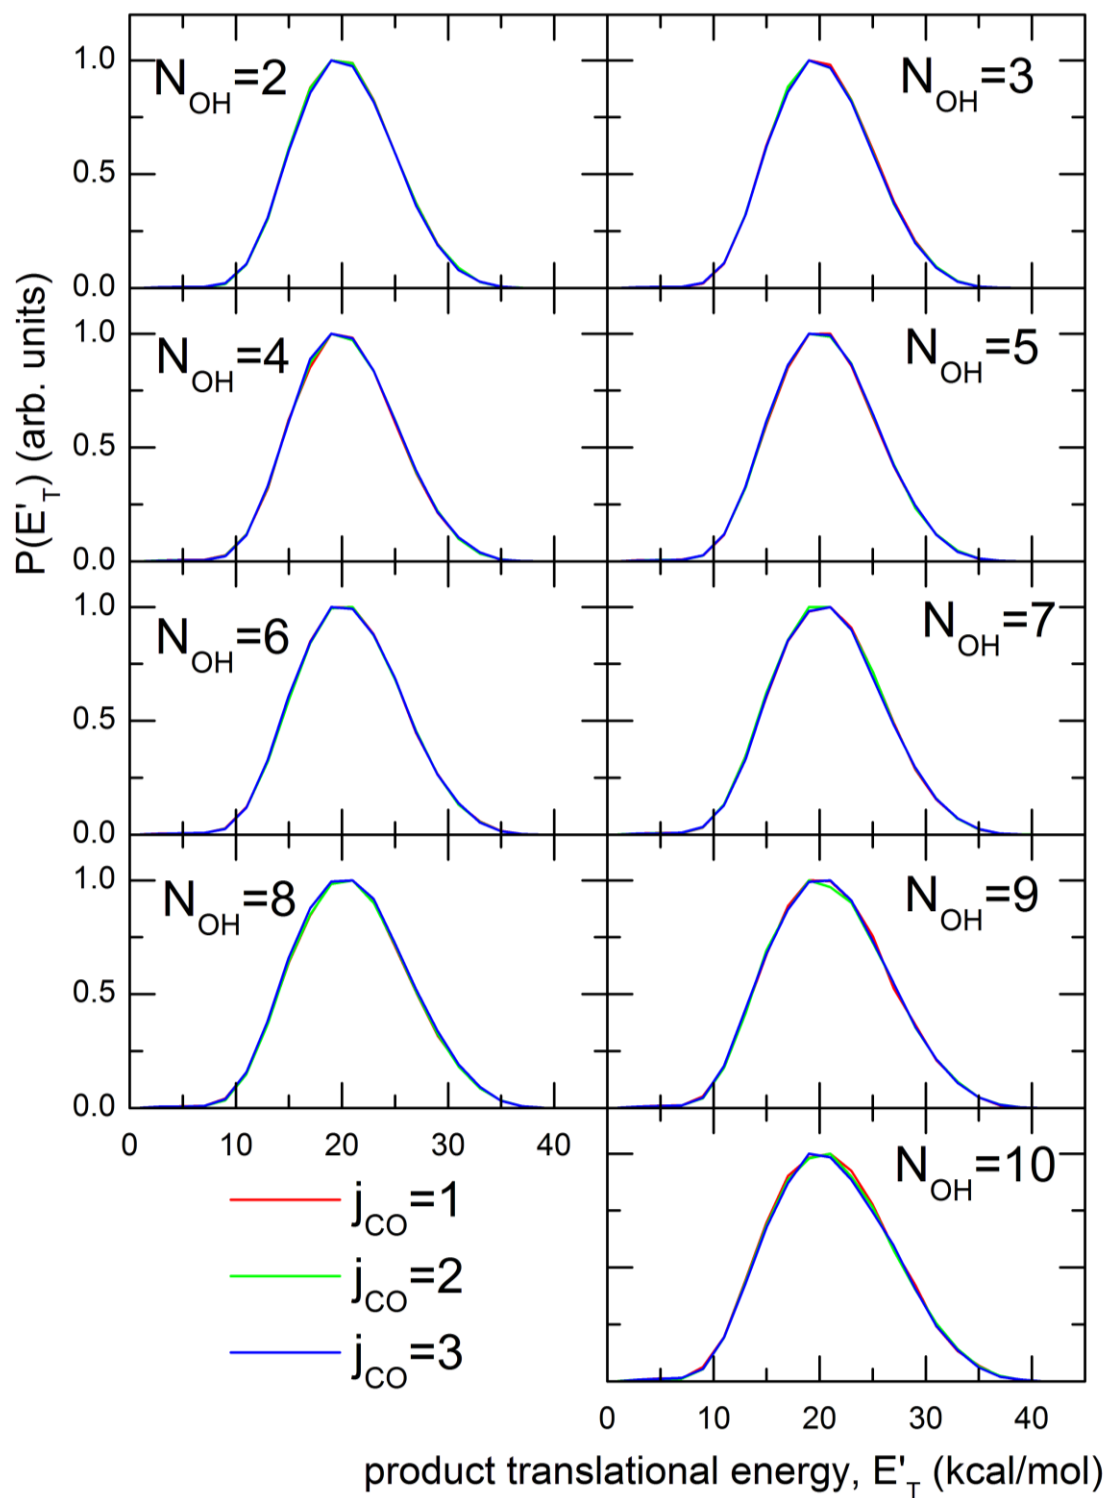

**Fig. S6** PTDs for different OH rotational levels for the reactions  $\text{OH}(N) + \text{CO}(j=1,2,3) \rightarrow \text{CO}_2 + \text{H}$  at  $E_c$  of  $14.1 \text{ kcal mol}^{-1}$  from QCT calculations on the YMS PES.

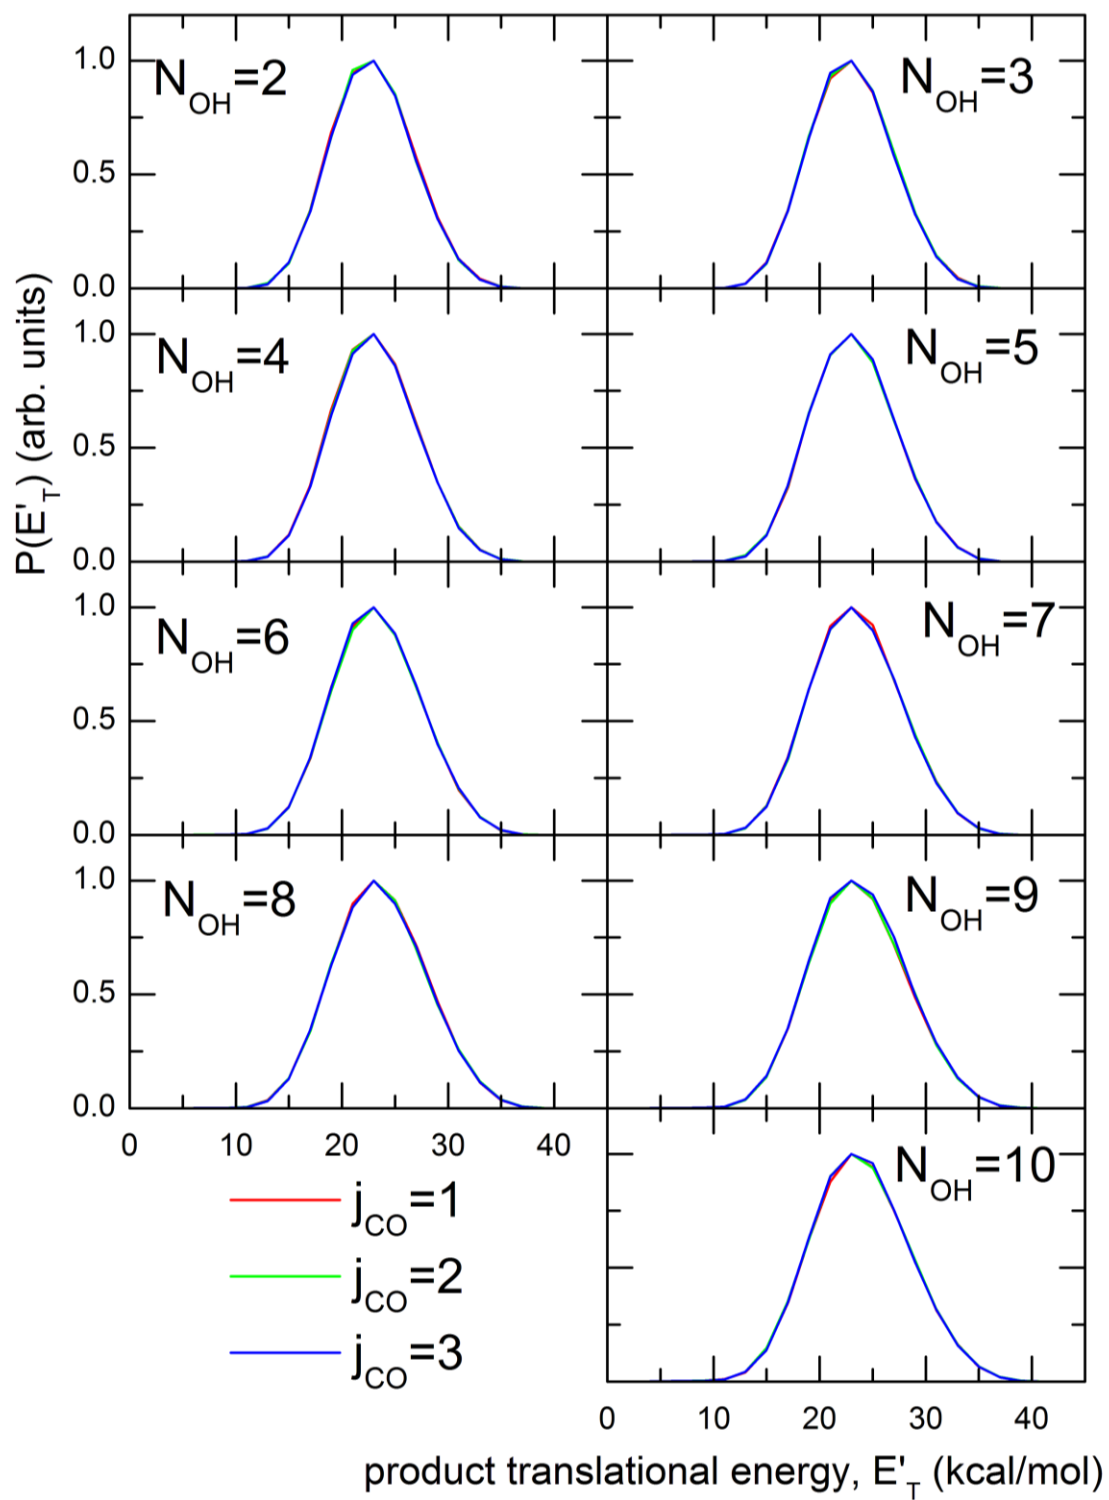

**Fig. S7** PTDs for different OH rotational levels for the reactions  $\text{OH}(N) + \text{CO}(j=1,2,3) \rightarrow \text{CO}_2 + \text{H}$  at  $E_c$  of  $8.6 \text{ kcal mol}^{-1}$  from QCT calculations on the LTSH PES.

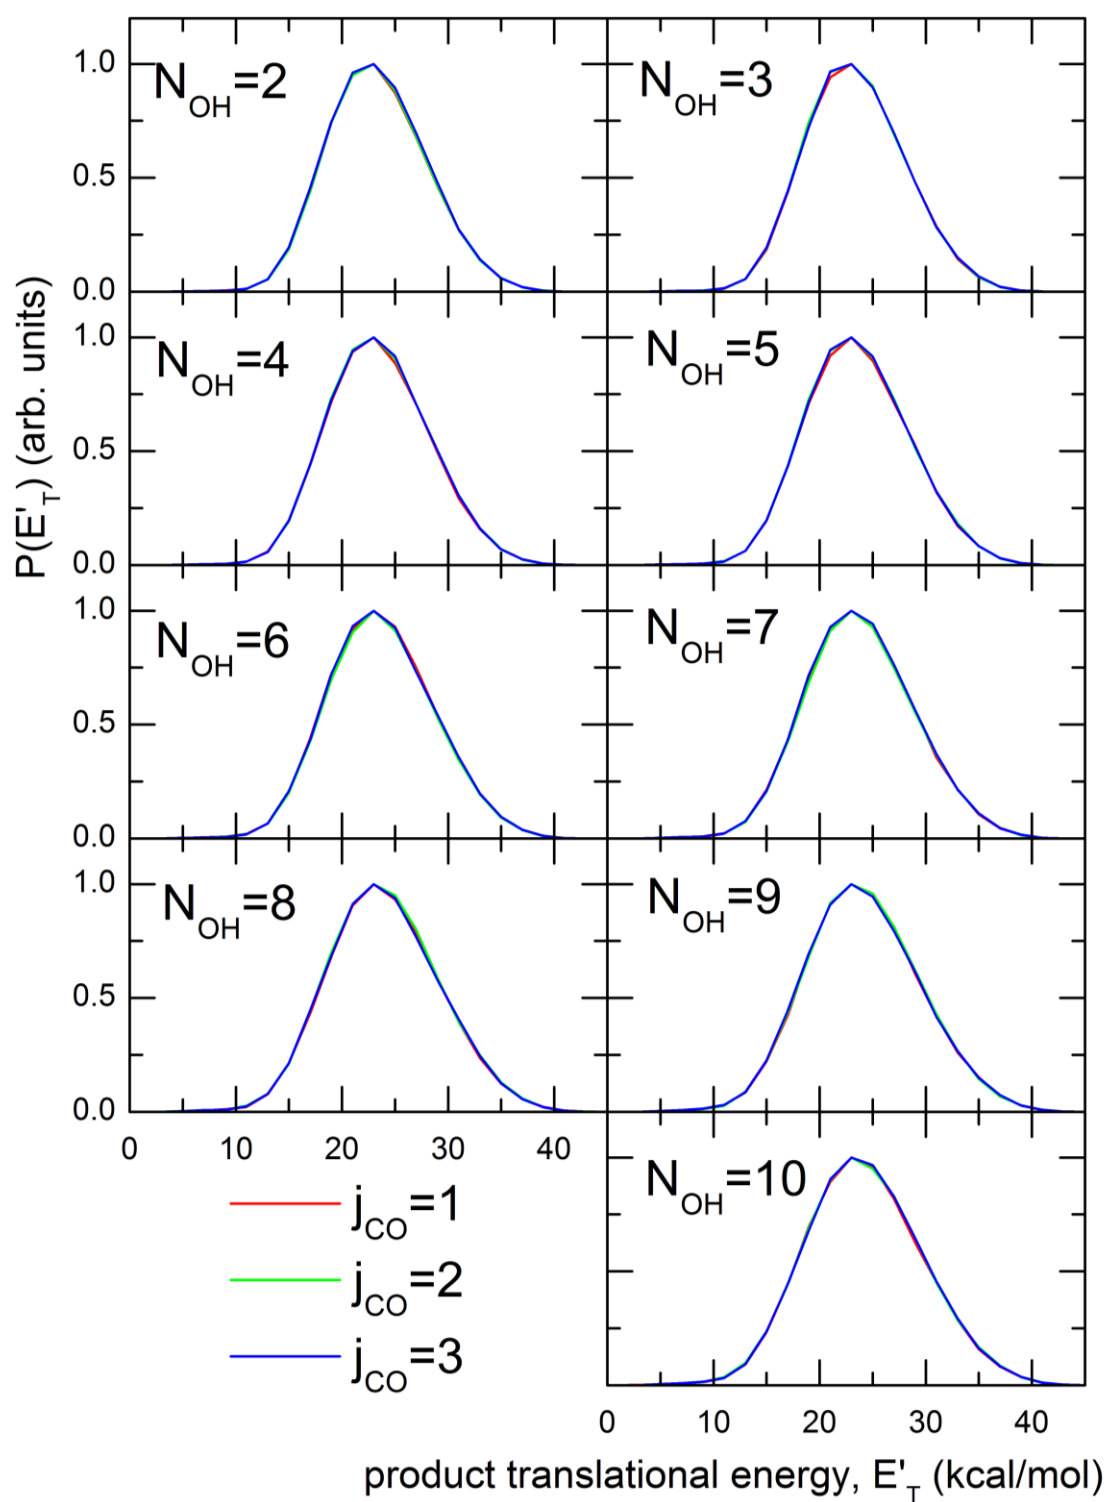

**Fig. S8** PTDs for different OH rotational levels for the reactions  $\text{OH}(N) + \text{CO}(j=1,2,3) \rightarrow \text{CO}_2 + \text{H}$  at  $E_c$  of  $14.1 \text{ kcal mol}^{-1}$  from QCT calculations on the LTSH PES.
